# Supplementary material for: Comparative Analysis of SARS-CoV-2 Antibody Responses across Global and Lesser-Studied Vaccines
Source: MDPI journal article supplement (doi:10.3390/vaccines12030326), 2024-03-19
Supplement: s1 [file s1]

**Figure S1. Anti-Spike antibody titers per vaccine and number of dose.** Boxplots showing the anti-spike antibody magnitude by number of dose. T-test p-values from pairwise comparisons are shown

above boxplots. Significant p-values are shown with stars. N.S is a p-value > 0.05, one star is a p-value less than 0.05, two stars are a p-value less than 0.01, and three stars are a p-value less than 0.001.

**Table S1.** Participant demographics, vaccination status, number of doses, self-reported COVID and anti-spike antibody titer distribution.

|                                       | Overall               | AstraZeneca         | Abdala               | Pfizer               | Soberana             | Sputnik             | Unvaccinated       |
|---------------------------------------|-----------------------|---------------------|----------------------|----------------------|----------------------|---------------------|--------------------|
| N                                     | 3195                  | 802                 | 801                  | 272                  | 270                  | 717                 | 333                |
| Vaccinated = Yes (%)                  | 2862 (89.6)           | 802 (100.0)         | 801 (100.0)          | 272 (100.0)          | 270 (100.0)          | 717 (100.0)         | -                  |
| Health Center (%)                     |                       |                     |                      |                      |                      |                     |                    |
| Roger Osorio                          | 955 (29.9)            | 235 (29.3)          | 240 (30.0)           | 81 (29.8)            | 80 (29.6)            | 211 (29.4)          | 108 (32.4)         |
| Silvia Ferrufino                      | 910 (28.5)            | 229 (28.6)          | 239 (29.8)           | 88 (32.4)            | 75 (27.8)            | 194 (27.1)          | 85 (25.5)          |
| Villa Libertad                        | 1330 (41.6)           | 338 (42.1)          | 322 (40.2)           | 103 (37.9)           | 115 (42.6)           | 312 (43.5)          | 140 (42.0)         |
| Age group (%)                         |                       |                     |                      |                      |                      |                     |                    |
| 2-11                                  | 590 (18.4)            | 0 (0.0)             | 248 (30.8)           | 0 (0.0)              | 267 (98.9)           | 0 (0.0)             | 75 (22.5)          |
| 12-17                                 | 631 (19.7)            | 0 (0.0)             | 547 (68.0)           | 14 (5.1)             | 3 (1.1)              | 0 (0.0)             | 67 (20.1)          |
| 18-29                                 | 632 (19.7)            | 192 (23.9)          | 10 (1.2)             | 158 (57.9)           | 0 (0.0)              | 204 (28.5)          | 68 (20.4)          |
| 30-59                                 | 726 (22.7)            | 308 (38.4)          | 0 (0.0)              | 101 (37.0)           | 0 (0.0)              | 246 (34.3)          | 71 (21.3)          |
| >=60                                  | 622 (19.4)            | 303 (37.7)          | 0 (0.0)              | 0 (0.0)              | 0 (0.0)              | 267 (37.2)          | 52 (15.6)          |
| Sex = Female (%)                      | 2067 (64.7)           | 535 (66.7)          | 454 (56.7)           | 267 (98.2)           | 135 (50.0)           | 472 (65.8)          | 204 (61.3)         |
| Vaccination status (%)                |                       |                     |                      |                      |                      |                     |                    |
| Incomplete                            | 1405 (49.1)           | 367 (45.8)          | 575 (71.8)           | 138 (50.7)           | 192 (71.1)           | 133 (18.5)          | -                  |
| Complete                              | 1027 (35.9)           | 239 (29.8)          | 226 (28.2)           | 134 (49.3)           | 78 (28.9)            | 350 (48.8)          | -                  |
| Heterotypic boost                     | 43 (1.5)              | 39 (4.9)            | 0 (0.0)              | 0 (0.0)              | 0 (0.0)              | 4 (0.6)             | -                  |
| Homotypic boost                       | 387 (13.5)            | 157 (19.6)          | 0 (0.0)              | 0 (0.0)              | 0 (0.0)              | 230 (32.1)          | -                  |
| Days after last dose (median (Q1-Q3)) | 93 (39 - 206)         | 104 (53 - 246)      | 68 (33 - 146)        | 92 (35 - 161)        | 55 (23 - 120)        | 120 (55 - 234)      | -                  |
| Number of dose (%)                    |                       |                     |                      |                      |                      |                     |                    |
| 1                                     | 1334 (46.6)           | 367 (45.8)          | 296 (37.0)           | 137 (50.4)           | 101 (37.4)           | 433 (60.4)          | -                  |
| 2                                     | 932 (32.6)            | 240 (29.9)          | 279 (34.8)           | 135 (49.6)           | 91 (33.7)            | 187 (26.1)          | -                  |
| 3                                     | 596 (20.8)            | 195 (24.3)          | 226 (28.2)           | 0 (0.0)              | 78 (28.9)            | 97 (13.5)           | -                  |
| COVID (Self-reported) (%)             |                       |                     |                      |                      |                      |                     |                    |
| Yes                                   | 416 (13.0)            | 154 (19.2)          | 37 (4.6)             | 35 (12.9)            | 5 (1.9)              | 147 (20.5)          | 38 (11.4)          |
| Unknown                               | 109 (3.4)             | 33 (4.1)            | 16 (2.0)             | 8 (2.9)              | 5 (1.9)              | 28 (3.9)            | 19 (5.7)           |
| No                                    | 2669 (83.6)           | 615 (76.7)          | 747 (93.4)           | 229 (84.2)           | 260 (96.3)           | 542 (75.6)          | 276 (82.9)         |
| Titer (median (Q1-Q3))                | 56692 (14080 - 97883) | 47764 (12860-82321) | 67501 (28480-100001) | 67314 (35454-100001) | 94062 (41688-100001) | 49048 (14091-85325) | 10867 (3330-70641) |
| Titer group (%)                       |                       |                     |                      |                      |                      |                     |                    |
| <100                                  | 37 (1.2)              | 3 (0.4)             | 14 (1.7)             | 1 (0.4)              | 1 (0.4)              | 2 (0.3)             | 16 (4.8)           |
| 100-1000                              | 116 (3.6)             | 19 (2.4)            | 36 (4.5)             | 5 (1.8)              | 4 (1.5)              | 14 (2.0)            | 38 (11.4)          |
| 1001-5000                             | 173 (5.4)             | 51 (6.4)            | 20 (2.5)             | 8 (2.9)              | 8 (3.0)              | 36 (5.0)            | 50 (15.0)          |
| 5001-10000                            | 385 (12.1)            | 109 (13.6)          | 66 (8.2)             | 21 (7.7)             | 23 (8.5)             | 106 (14.8)          | 60 (18.0)          |
| 10001-50000                           | 764 (23.9)            | 228 (28.4)          | 161 (20.1)           | 68 (25.0)            | 43 (15.9)            | 202 (28.2)          | 62 (18.6)          |
| 50001-100001                          | 948 (29.7)            | 250 (31.2)          | 246 (30.7)           | 87 (32.0)            | 61 (22.6)            | 237 (33.1)          | 67 (20.1)          |
| >100000                               | 772 (24.2)            | 142 (17.7)          | 258 (32.2)           | 82 (30.1)            | 130 (48.1)           | 120 (16.7)          | 40 (12.0)          |

**Table S2.** Seroprevalence of N antibodies in a random subset of unvaccinated participants by age, sex and health center population.

| Variable      | Categories       | N   | N seroprevalence (%)  | Fisher test |
|---------------|------------------|-----|-----------------------|-------------|
| Overall       | -                | 100 | 81 (71.67 - 87.89)    | -           |
| Age group     | 2-11             | 20  | 75 (50.59 - 90.41)    | 0.8516      |
|               | 12-17            | 19  | 89.47 (65.46 - 98.16) |             |
|               | 18-29            | 19  | 78.95 (53.9 - 93.03)  |             |
|               | 30-59            | 29  | 79.31 (59.74 - 91.29) |             |
|               | >60              | 13  | 84.62 (53.66 - 97.29) |             |
| Sex           | Female           | 77  | 80.52 (69.6 - 88.34)  | 1.000       |
|               | Male             | 23  | 82.61 (60.45 - 94.28) |             |
| Health Center | Roger Osorio     | 29  | 82.76 (63.51 - 93.47) | 0.8014      |
|               | Silvia Ferrufino | 25  | 76 (54.48 - 89.84)    |             |
|               | Villa Libertad   | 46  | 82.61 (68.05 - 91.68) |             |

**Table S3.** Antibody titer magnitude difference among vaccinated vs. unvaccinated individuals.

| Variable   | Category  | n    | Median titer | Univariate Analysis               |                  | Multivariate Analysis            |                  |
|------------|-----------|------|--------------|-----------------------------------|------------------|----------------------------------|------------------|
|            |           |      |              | Model estimate *                  | pvalue           | Model estimate **                | p-value          |
| Vaccinated | No        | 333  | 10867        | Ref.                              | -                | Ref.                             | -                |
|            | Yes       | 2862 | 59774        | <b>22303.5 [18155.6, 26451.5]</b> | <b>&lt;0.001</b> | <b>22897.5 [18779, 27016]</b>    | <b>&lt;0.001</b> |
| Age groups | 2-11 y/o  | 622  | 71494        | 10452.5 [6294.2, 14610.8]         | <0.001           | <b>11448.9 [7361.4, 15536.5]</b> | <b>&lt;0.001</b> |
|            | 12-17 y/o | 590  | 65560        | <b>8417.3 [4322.4, 12512.1]</b>   | <b>&lt;0.001</b> | <b>8949.8 [4927.4, 12972.2]</b>  | <b>&lt;0.001</b> |
|            | 18-29 y/o | 627  | 52345        | <b>1841.6 [-2246.8, 5929.9]</b>   | <b>0.38</b>      | 2394.9 [-1621.3, 6411]           | 0.24             |
|            | 30-59 y/o | 631  | 47262        | -855.4 [-4810.0, 3099.2]          | 0.67             | -527.3 [-4411.3, 3356.8]         | 0.79             |
|            | ≥60 y/o   | 725  | 50572        | Ref.                              | -                | Ref.                             | -                |

\* simple linear model, \*\* Linear model adjusted for Vaccinated and age groups.

**Table S4.** Determinants of antibody magnitude among the vaccinated group including number of dose.

| Covariate                          | Category            | Multivariate Analysis             |                  |
|------------------------------------|---------------------|-----------------------------------|------------------|
|                                    |                     | Model estimate *                  | P-value          |
| Age groups                         | 2-11 y/o            | -14970.0 [-30787.4, 847.5]        | 0.064            |
|                                    | 12-17 y/o           | -12906.0 [-28035.1, 2223.1]       | 0.095            |
|                                    | 18-29 y/o           | -1585.1 [-6121.2, 2951.1]         | 0.494            |
|                                    | 30-59 y/o           | -2960.9 [-7142.6, 1220.9]         | 0.165            |
|                                    | ≥60 y/o             | Ref.                              | -                |
| Sex                                | Male                | Ref.                              | -                |
|                                    | Female              | 2705.7 [-169.4, 5580.9]           | 0.065            |
|                                    | Astrazeneca         | Ref.                              | -                |
| Type of vaccine                    | Abdala              | <b>24325.6 [9358.6, 39292.6]</b>  | <b>0.002</b>     |
|                                    | Pfizer              | <b>13753.9 [8379.3, 19128.6]</b>  | <b>&lt;0.001</b> |
|                                    | Soberana            | <b>35238.5 [19073.8, 51403.2]</b> | <b>&lt;0.001</b> |
|                                    | Sputnik             | 2473.7 [-1229.7, 6177.1]          | 0.191            |
|                                    | Incomplete          | Ref.                              | -                |
| Vaccination status                 | Complete            | <b>7181.5 [4122.8, 10240.2]</b>   | <b>&lt;0.001</b> |
|                                    | Homotypic boost     | 2105.7 [-2537.3, 6748.6]          | 0.374            |
|                                    | Heterotypic boost   | 956.8 [-10600.0, 12513.5]         | 0.871            |
| Days after last dose               | Titer change by day | -0.5 [-1.4, 0.3]                  | 0.222            |
|                                    | 1                   | Ref.                              | -                |
| Number of dose                     | 2                   | <b>5872.1 [2806.2, 8938]</b>      | <b>&lt;0.001</b> |
|                                    | 3                   | <b>5361.4 [1739.4, 8983.3]</b>    | <b>0.004</b>     |
|                                    | Yes                 | Ref.                              | -                |
| Self-reported SARS-CoV-2 infection | Unsure              | -5866.3 [-14256.5, 2524.0]        | 0.171            |
|                                    | No                  | -2270.6 [-6609, 2067.8]           | 0.305            |

\*Linear model adjusted by age groups, sex, type of vaccine, vaccine status, days after last dose and self-reported SARS-CoV-2 infection.

**Table S5.** Stratified antibody dynamics by vaccine type and vaccine status.

| Type of Vaccine | Vaccination Status | n   | Days after Last Dose - Median (IQR) | Titer Change by Day *    | P-Value      | Adjusted p-Value ** |
|-----------------|--------------------|-----|-------------------------------------|--------------------------|--------------|---------------------|
| ASTRAZENECA     | Incomplete         | 351 | 173 (102-309)                       | -27.0 [-53.6, -0.3]      | 0.047        | 0.206               |
|                 | Complete           | 189 | 98 (62-226)                         | -16.7 [-60.7, 27.4]      | 0.457        | 0.697               |
|                 | Homotypic boost    | 113 | 83 (60-161)                         | <b>79.3 [7.9, 150.7]</b> | <b>0.030</b> | 0.157               |
|                 | Heterotypic boost  | 64  | 64 (33-240)                         | 9.7 [-111.4, 130.7]      | 0.869        | 0.904               |
| SPUTNIK         | Incomplete         | 123 | 248 (205-323)                       | <b>57.2 [5.6, 108.8]</b> | <b>0.030</b> | 0.157               |
|                 | Complete           | 322 | 124.5 (93-228)                      | <b>51.2 [15.8, 86.6]</b> | <b>0.005</b> | 0.116               |
|                 | Homotypic boost    | 158 | 55.5 (31-179)                       | 43.0 [-7.6, 93.5]        | 0.095        | 0.347               |
|                 | Heterotypic boost  | 1   | -                                   | -                        | -            | -                   |
| SOBERANA        | Incomplete         | 168 | 82 (46-166)                         | -39.8 [-99.2, 19.5]      | 0.187        | 0.458               |
|                 | Complete           | 36  | 51 (35-177)                         | -93.2 [-246.7, 60.3]     | 0.225        | 0.458               |
| ABDALA          | Incomplete         | 526 | 97 (55-178)                         | -24.7 [-54.6, 5.3]       | 0.107        | 0.347               |
|                 | Complete           | 141 | 55 (33-139)                         | <b>63.2 [8.2, 118.1]</b> | <b>0.025</b> | 0.157               |
| PFIZER          | Incomplete         | 114 | 117 (91-209)                        | -15.8 [-71.2, 39.6]      | 0.573        | 0.745               |
|                 | Complete           | 113 | 83 (50-161)                         | -19.2 [-79.0, 40.6]      | 0.526        | 0.720               |

\* Linear models adjusted by age, \*\* Benjamini-Hochberg p-value correction for multiple testing.

**Table S6.** Determinants of antibody magnitude among the vaccinated with time interactions.

| Covariate            | Category            | n    | Model estimate (Magnitude) *       | P-value          | Model estimate (Dynamics titer/day) ** | P-value      |
|----------------------|---------------------|------|------------------------------------|------------------|----------------------------------------|--------------|
| Age groups           | 2-11 y/o            | 420  | -15457.4 [-32849.3, 1934.5]        | 0.082            | -                                      | -            |
|                      | 12-17 y/o           | 457  | -14663.7 [-31333.5, 2006.2]        | 0.085            | -                                      | -            |
|                      | 18-29 y/o           | 456  | 1425.3 [-3545.0, 6395.6]           | 0.574            | -                                      | -            |
|                      | 30-59 y/o           | 509  | -2418.7 [-6896.1, 2058.6]          | 0.290            | -                                      | -            |
|                      | >=60 y/o            | 512  | Ref.                               | -                | -                                      | -            |
| Sex                  | Male                | 829  | Ref.                               | -                | -                                      | -            |
|                      | Female              | 1525 | 2214.3 [-897.5, 5326.0]            | 0.163            | -                                      | -            |
| Type of vaccine      | Astrazeneca         | 653  | Ref.                               | -                | Ref.                                   | -            |
|                      | Abdala              | 667  | <b>28572.3 [11317.7, 45826.9]</b>  | <b>0.0012</b>    | -7.0 [-40.1, 26.0]                     | 0.677        |
|                      | Pfizer              | 227  | <b>15516.7 [6272.4, 24760.9]</b>   | <b>0.001</b>     | -22.0 [-68.9, 24.8]                    | 0.357        |
|                      | Soberana            | 204  | <b>40680.4 [21358.5, 60002.2]</b>  | <b>&lt;0.001</b> | -39.2 [-95.5, 17.2]                    | 0.173        |
|                      | Sputnik             | 603  | <b>-8845.3 [-15955.4, -1735.2]</b> | <b>0.015</b>     | <b>40.3 [8.4, 72.3]</b>                | <b>0.014</b> |
| Vaccination Status   | Incomplete          | 1282 | Ref.                               | -                | Ref.                                   | -            |
|                      | Complete            | 801  | <b>6289.2 [629.3, 11949.1]</b>     | <b>0.030</b>     | 10.9 [-17.2, 39.1]                     | 0.447        |
|                      | Homotypic boost     | 271  | -190.7 [-8827.0, 8445.6]           | 0.966            | 32.9 [-15.1, 80.9]                     | 0.179        |
| Days after last dose |                     | 2354 | -                                  | -                | -                                      | -            |
|                      | Titer change by day | -    | -6.4 [-28.7, 16.0]                 | 0.576            | -                                      | -            |
| Self-reported COVID  | Yes                 | 248  | Ref.                               | -                | -                                      | -            |
|                      | Unsure              | 76   | -2382.2 [-11552.5, 6788.1]         | 0.611            | -                                      | -            |
|                      | No                  | 2030 | -1357.9 [-6164.7, 3448.8]          | 0.580            | -                                      | -            |

\* Multivariate linear regression adjusted by age groups, sex, type of vaccine, vaccine status, days after last dose and self-reported SARS-CoV-2 infection and the interaction of vaccination status and type with days after last dose. Estimates show the main effects of age, sex, type of vaccine, vaccination status, days after last dose and self-reported covid. \*\* Interaction terms between time since last dose and type of vaccine and vaccination status in the same multivariate model
